# Supplementary material
Source: publisher site journal article supplement (https://www.degruyterbrill.com/publication/isbn/9783050047508/downloadAsset/9783050047508_Buchinformation.pdf)
Supplement: Supplementary file 1 [file 9783050047508_Buchinformation.pdf]

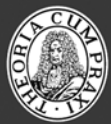

# Akademie Verlag

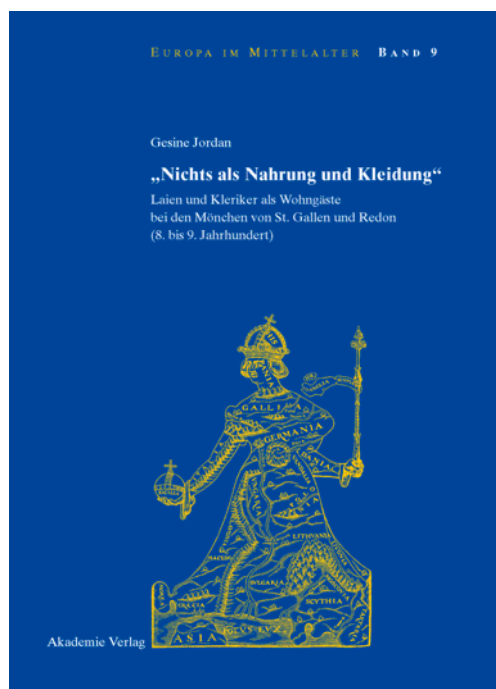

Gesine Jordan

## „Nichts als Nahrung und Kleidung“

Laien und Kleriker als Wohngäste bei den  
Mönchen von St. Gallen und Redon  
(8. und 9. Jahrhundert)

*Europa im Mittelalter*, Band 9

2007. 310 Seiten, 1 Abbildungen, 170 x 240 mm  
Festeinband, € 64,80  
ISBN 978-3-05-004338-8

Immer wieder hegten Laien oder Weltkleriker im Frühen Mittelalter den Wunsch, im Kloster zu wohnen, ohne das monastische Versprechen abzulegen, womit sie zu Grenzgängern zwischen den religiösen Ständen des Mittelalters wurden.

Gesine Jordan untersucht vergleichend die Motive und individuellen Handlungsräume dieser weltlichen Wohngäste in den Klöstern St. Gallen und Redon. Laien und Kleriker, die sich aus der Welt zurückzogen und erklärten, sie wollten als Wohngäste der Mönche „nichts als Nahrung und Kleidung“ beanspruchen, wählten einen Weg der religiösen Konversion, der nicht über die benediktinische Profess führte. In Alemannien wie in der Bretagne bedeutete jedoch der dauerhafte Aufenthalt an einem heiligen Ort ein Privileg, das nicht allein aufgrund einer Güterschenkung, sondern auch aufgrund eines bestimmten sozialen Ranges gewährt wurde. Auf unterschiedliche und doch in vielem gleichartige Weise verwirklichten die Wohngäste individuelle Annäherungen an die monastische Lebensform und verbanden sich so den Mönchsgemeinschaften noch enger, als es etwa im Rahmen von Gebetsgemeinschaft und Stiftungen möglich war.
